# Supplementary material for: Empirical Bayes models for multiple probe type microarrays at the probe level
Source: PubMed Central journal article supplement (PMC2358895; doi:10.1186/1471-2105-9-156), 2008-03-20
Supplement: 1471-2105-9-156-S1.pdf [file 1471-2105-9-156-S1.pdf]

# Parameter estimation in PLW. Supplement to the article titled “Empirical Bayes models for multiple probe type arrays at the probe level”.

Magnus Åstrand

October 1, 2007

We consider step 1: estimating the parameters  $m$ ,  $\beta$  and  $\Sigma_A$ . Step 2 follows directly as a special case of step 1.

Let  $x_p$  denote the  $q-1$  sized sub-vectors obtained by dropping the last dimension of the vectors  $z_p$  and let  $H_p = H(\bar{y}_p)$  where  $H : \mathbb{R} \rightarrow \mathbb{R}^{2K-1}$  is a set B-spline basis functions for a given set of  $K$  interior spline-knots, see chapter 5 of Hastie et al. (2001). Thus for  $p = 1, \dots, P$

$$\begin{aligned} x_p | c_p &\sim N_{q-1}(0, c_p \Sigma_A) \\ c_p &\sim \Gamma^{-1}(\tfrac{1}{2}m, \tfrac{1}{2}m \cdot \exp\{H_p^T \beta\}) \end{aligned} \tag{1}$$

where  $N_n(\mu, \Sigma)$  denotes the  $n$ -dimensional normal distribution with mean  $\mu$  and covariance matrix  $\Sigma$ , and  $\Gamma^{-1}(k, \theta)$  is the inverse-gamma distribution with density function

$$f(x) = \frac{\theta^k}{\Gamma(k)} x^{-(k+1)} \exp\{-\theta/x\}, \quad x > 0.$$

For later use, note that for  $X \sim \Gamma^{-1}(k, \theta)$  we have  $E[\log(X)] = \log(\theta) - \psi(k)$  and  $E[X^{-1}] = k/\theta$  from the properties of the log-gamma and gamma distribution respectively (Johnson et al. 1995, page 89-90). Here  $\psi(x) = \frac{d}{dx} \log \Gamma(x)$  is the digamma function.

Treating  $x_p$  and  $c_p$  as observed data the contribution from probe  $p$  to the full log-likelihood (ignoring constant terms) of model (1) is

$$\begin{aligned} \mathcal{L}_p &= -\frac{1}{2} \log(|\Sigma_A|) - \frac{x_p^T \Sigma_A^{-1} x_p}{2c_p} \\ &\quad + \frac{m}{2} H_p^T \beta - \frac{m \cdot \exp\{H_p^T \beta\}}{2c_p} \\ &\quad - \frac{m}{2} \log(c_p) + \frac{m}{2} \log\left(\frac{m}{2}\right) - \log(\Gamma(m/2)). \end{aligned} \tag{2}$$

In the E-step of the EM-algorithm the expectation of  $\mathcal{L}_p$  is calculated with respect to the conditional distribution of  $c_p$  given  $x_p$  and governed by the parameter estimates from the previous iteration:  $m_0$ ,  $\beta_0$  and  $\Sigma_{A0}$ :

$$Q_p = E[\mathcal{L}_p | x_p, m_0, \beta_0, \Sigma_{A0}]$$

Since  $c_p$  given  $x_p$  is  $\Gamma^{-1}$ -distributed with parameters

$$\frac{m_0 + q - 1}{2} \quad \text{and} \quad \frac{x_p^T \Sigma_{A0}^{-1} x_p + m_0 \exp\{H_p^T \beta_0\}}{2}$$

we have

$$\begin{aligned} Q_p &= -\frac{1}{2} \log(|\Sigma_A|) - \frac{x_p^T \Sigma_A^{-1} x_p}{2} \cdot \frac{m_0 + q - 1}{x_p^T \Sigma_{A0}^{-1} x_p + m_0 \exp\{H_p^T \beta_0\}} \\ &\quad + \frac{m}{2} \left( H_p^T \beta - \exp\{H_p^T \beta\} \cdot \frac{m_0 + q - 1}{x_p^T \Sigma_{A0}^{-1} x_p + m_0 \exp\{H_p^T \beta_0\}} \right) \\ &\quad - \frac{m}{2} \left( \log \left( \frac{x_p^T \Sigma_{A0}^{-1} x_p + m_0 \exp\{H_p^T \beta_0\}}{2} \right) - \psi \left( \frac{m_0 + q - 1}{2} \right) \right) \\ &\quad + \frac{m}{2} \log \left( \frac{m}{2} \right) - \log(\Gamma(m/2)) . \end{aligned} \quad (3)$$

With

$$w_p = \frac{m_0 + q - 1}{x_p^T \Sigma_{A0}^{-1} x_p + m_0 \exp\{H_p^T \beta_0\}} .$$

we can rewrite  $Q_p$  as

$$\begin{aligned} Q_p &= -\frac{1}{2} \log(|\Sigma_A|) - \frac{x_p^T \Sigma_A^{-1} x_p}{2} \cdot w_p \\ &\quad + \frac{m}{2} \left( H_p^T \beta - \exp\{H_p^T \beta\} \cdot w_p \right) \\ &\quad + \frac{m}{2} \left( \log(w_p) + \log \left( \frac{m}{m_0 + q - 1} \right) + \psi \left( \frac{m_0 + q - 1}{2} \right) \right) \\ &\quad - \log(\Gamma(m/2)) . \end{aligned} \quad (4)$$

In the M-step of the EM-algorithm  $Q_1 + \dots + Q_P$  is maximized with respect to  $m$ ,  $\beta$ , and  $\Sigma_A$ . Starting with  $\Sigma_A$ , since only the first row of (4) depends on  $\Sigma_A$  the updated estimate of  $\Sigma_A$  is obtained directly as

$$\hat{\Sigma}_A = \frac{1}{P} \sum_{p=1}^P w_p x_p x_p^T . \quad (5)$$

Continuing with  $\beta$  only the second row of (4) needs to be considered. However, here numerical optimization is needed to find an updated estimate of  $\beta$  by maximizing the function  $h(\beta)$  defined as

$$h(\beta) = \frac{1}{P} \sum_{p=1}^P \left( H_p^T \beta - w_p \cdot \exp\{H_p^T \beta\} \right)$$

with gradient equal to

$$\nabla h(\beta) = \frac{1}{P} \sum_{p=1}^P H_p \left( 1 - w_p \cdot \exp\{H_p^T \beta\} \right) .$$

Since each evaluation of the function (and gradient) involves summing over all probes a quasi-Newton optimization method (variable metric algorithm) implemented in C is used for shorter computer run times. Given the updated estimate  $\hat{\beta}$ , we then find the value of  $m$  maximizing  $Q_1 + \dots + Q_P$  through numerical optimization of the function  $f$ :

$$f(m) = \frac{m}{2} \left( \log(m) + S \right) - \log \left( \Gamma(m/2) \right) .$$

where

$$S = h(\hat{\beta}) + \psi \left( \frac{m_0 + q - 1}{2} \right) - \log(m_0 + q - 1) + \frac{1}{P} \sum_{p=1}^P \log(w_p) . \quad (6)$$

## References

- Hastie, T., R. Tibshirani, and J. Friedman (2001). *The Elements of Statistical Learning* (First ed.), Volume 1. Springer.
- Johnson, N., S. Kotz, and N. Balakrishnan (1995). *Continuous Univariate Distributions* (Second ed.), Volume 2. John Wiley and Sons.
