# Supplementary material for: Empirical Bayes models for multiple probe type microarrays at the probe level
Source: PubMed Central journal article supplement (PMC2358895; doi:10.1186/1471-2105-9-156), 2008-03-20

Figure S1: ROC curves based on RMA pre-processed data

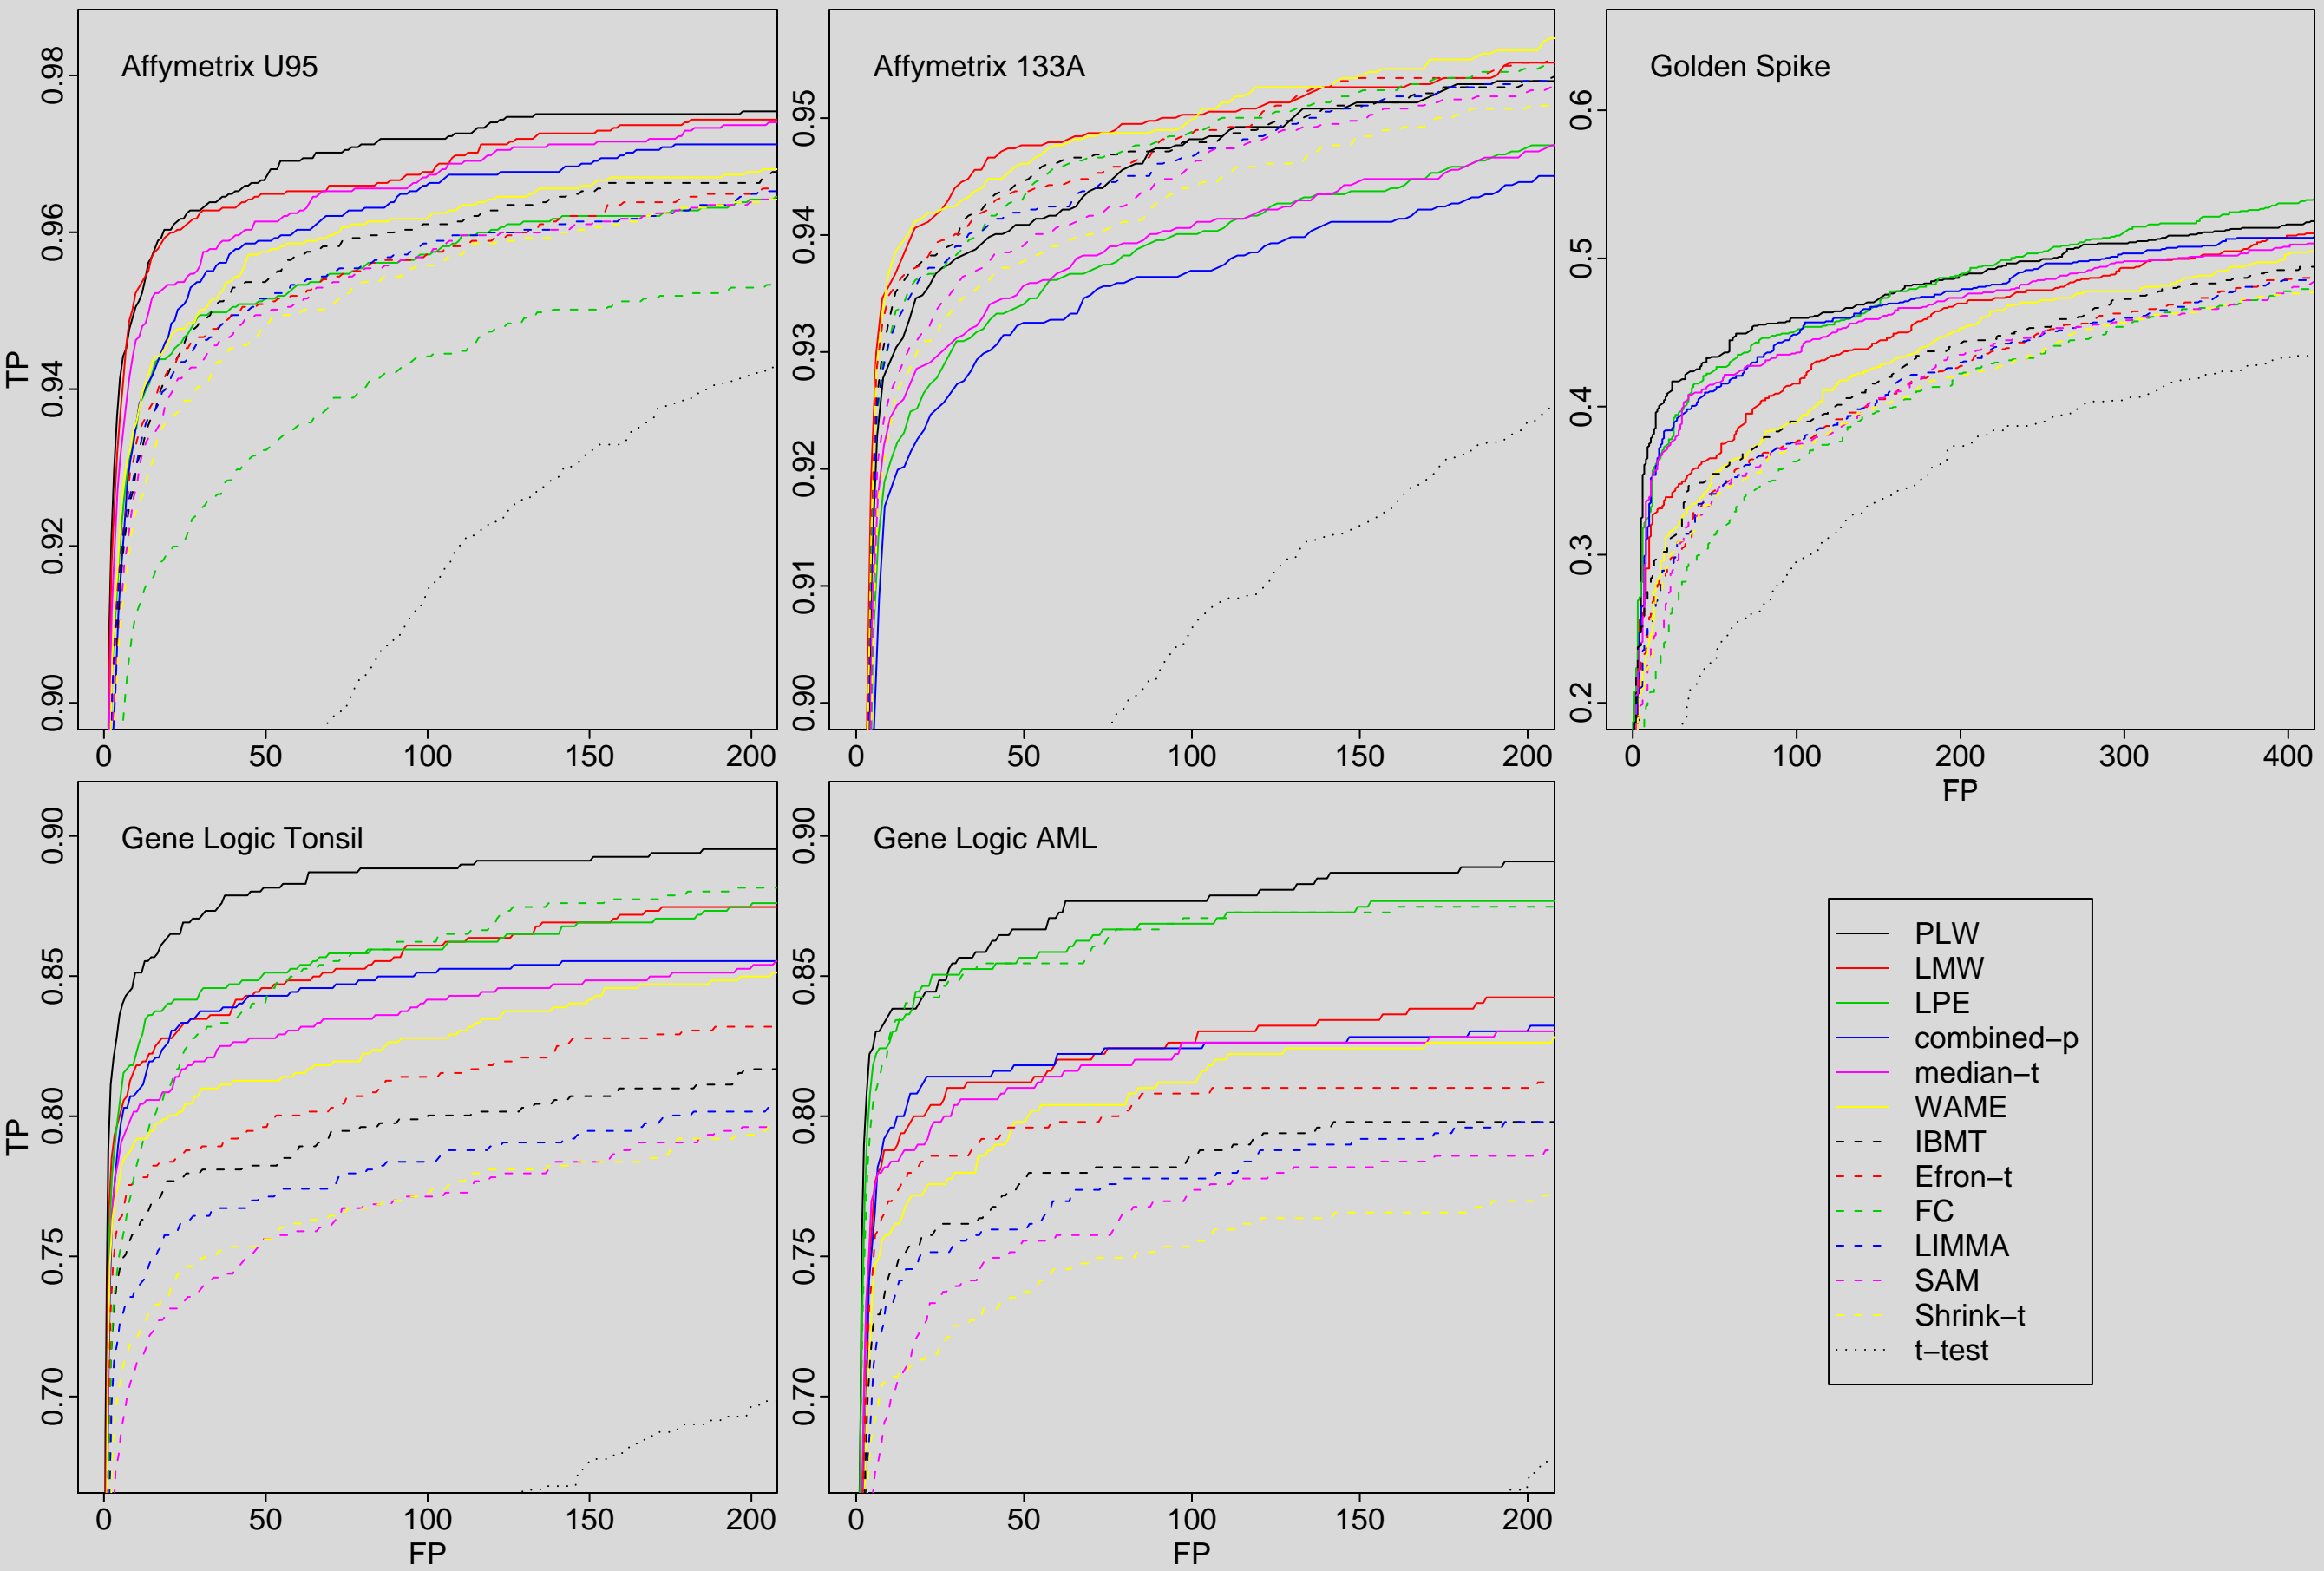

Figure S2: ROC curves based on GCRMA pre-processed data

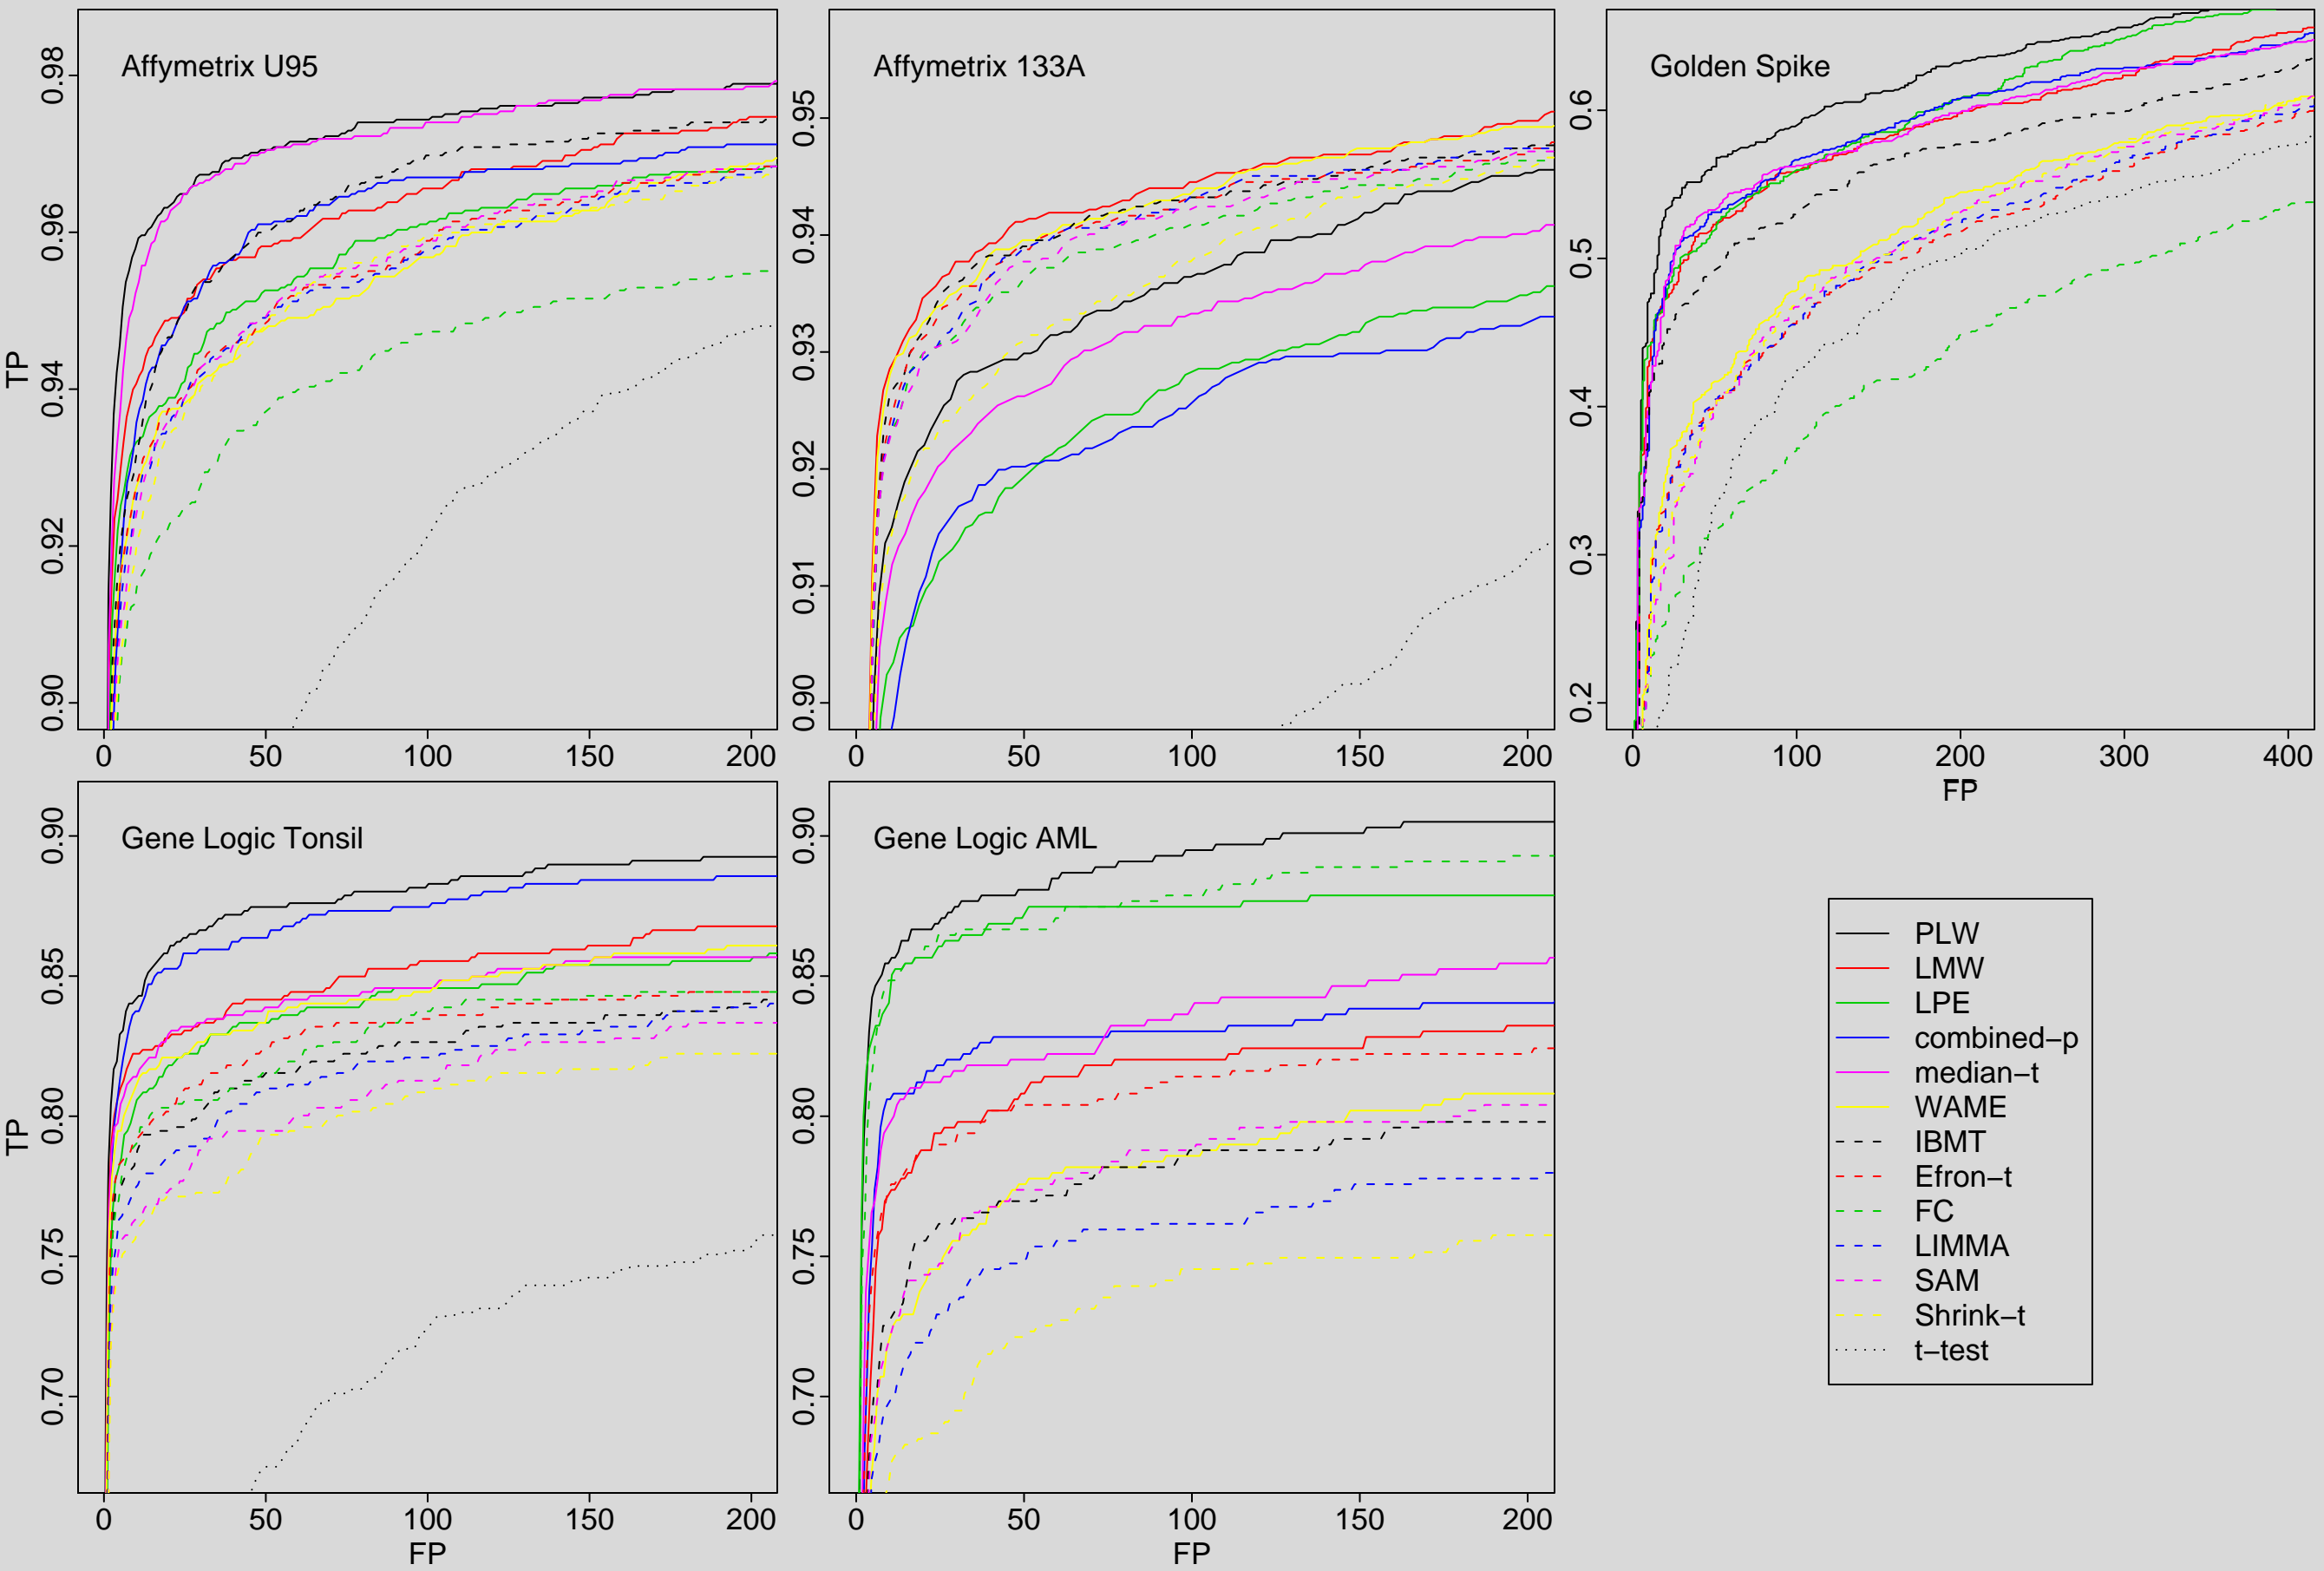

Figure S3: ROC curves based on MAS5 pre-processed data, together with ROC curves for PPLR, BGX, and logit-t  
 Note the range of y axis, line colors, and line types differs from Figures S1 and S2

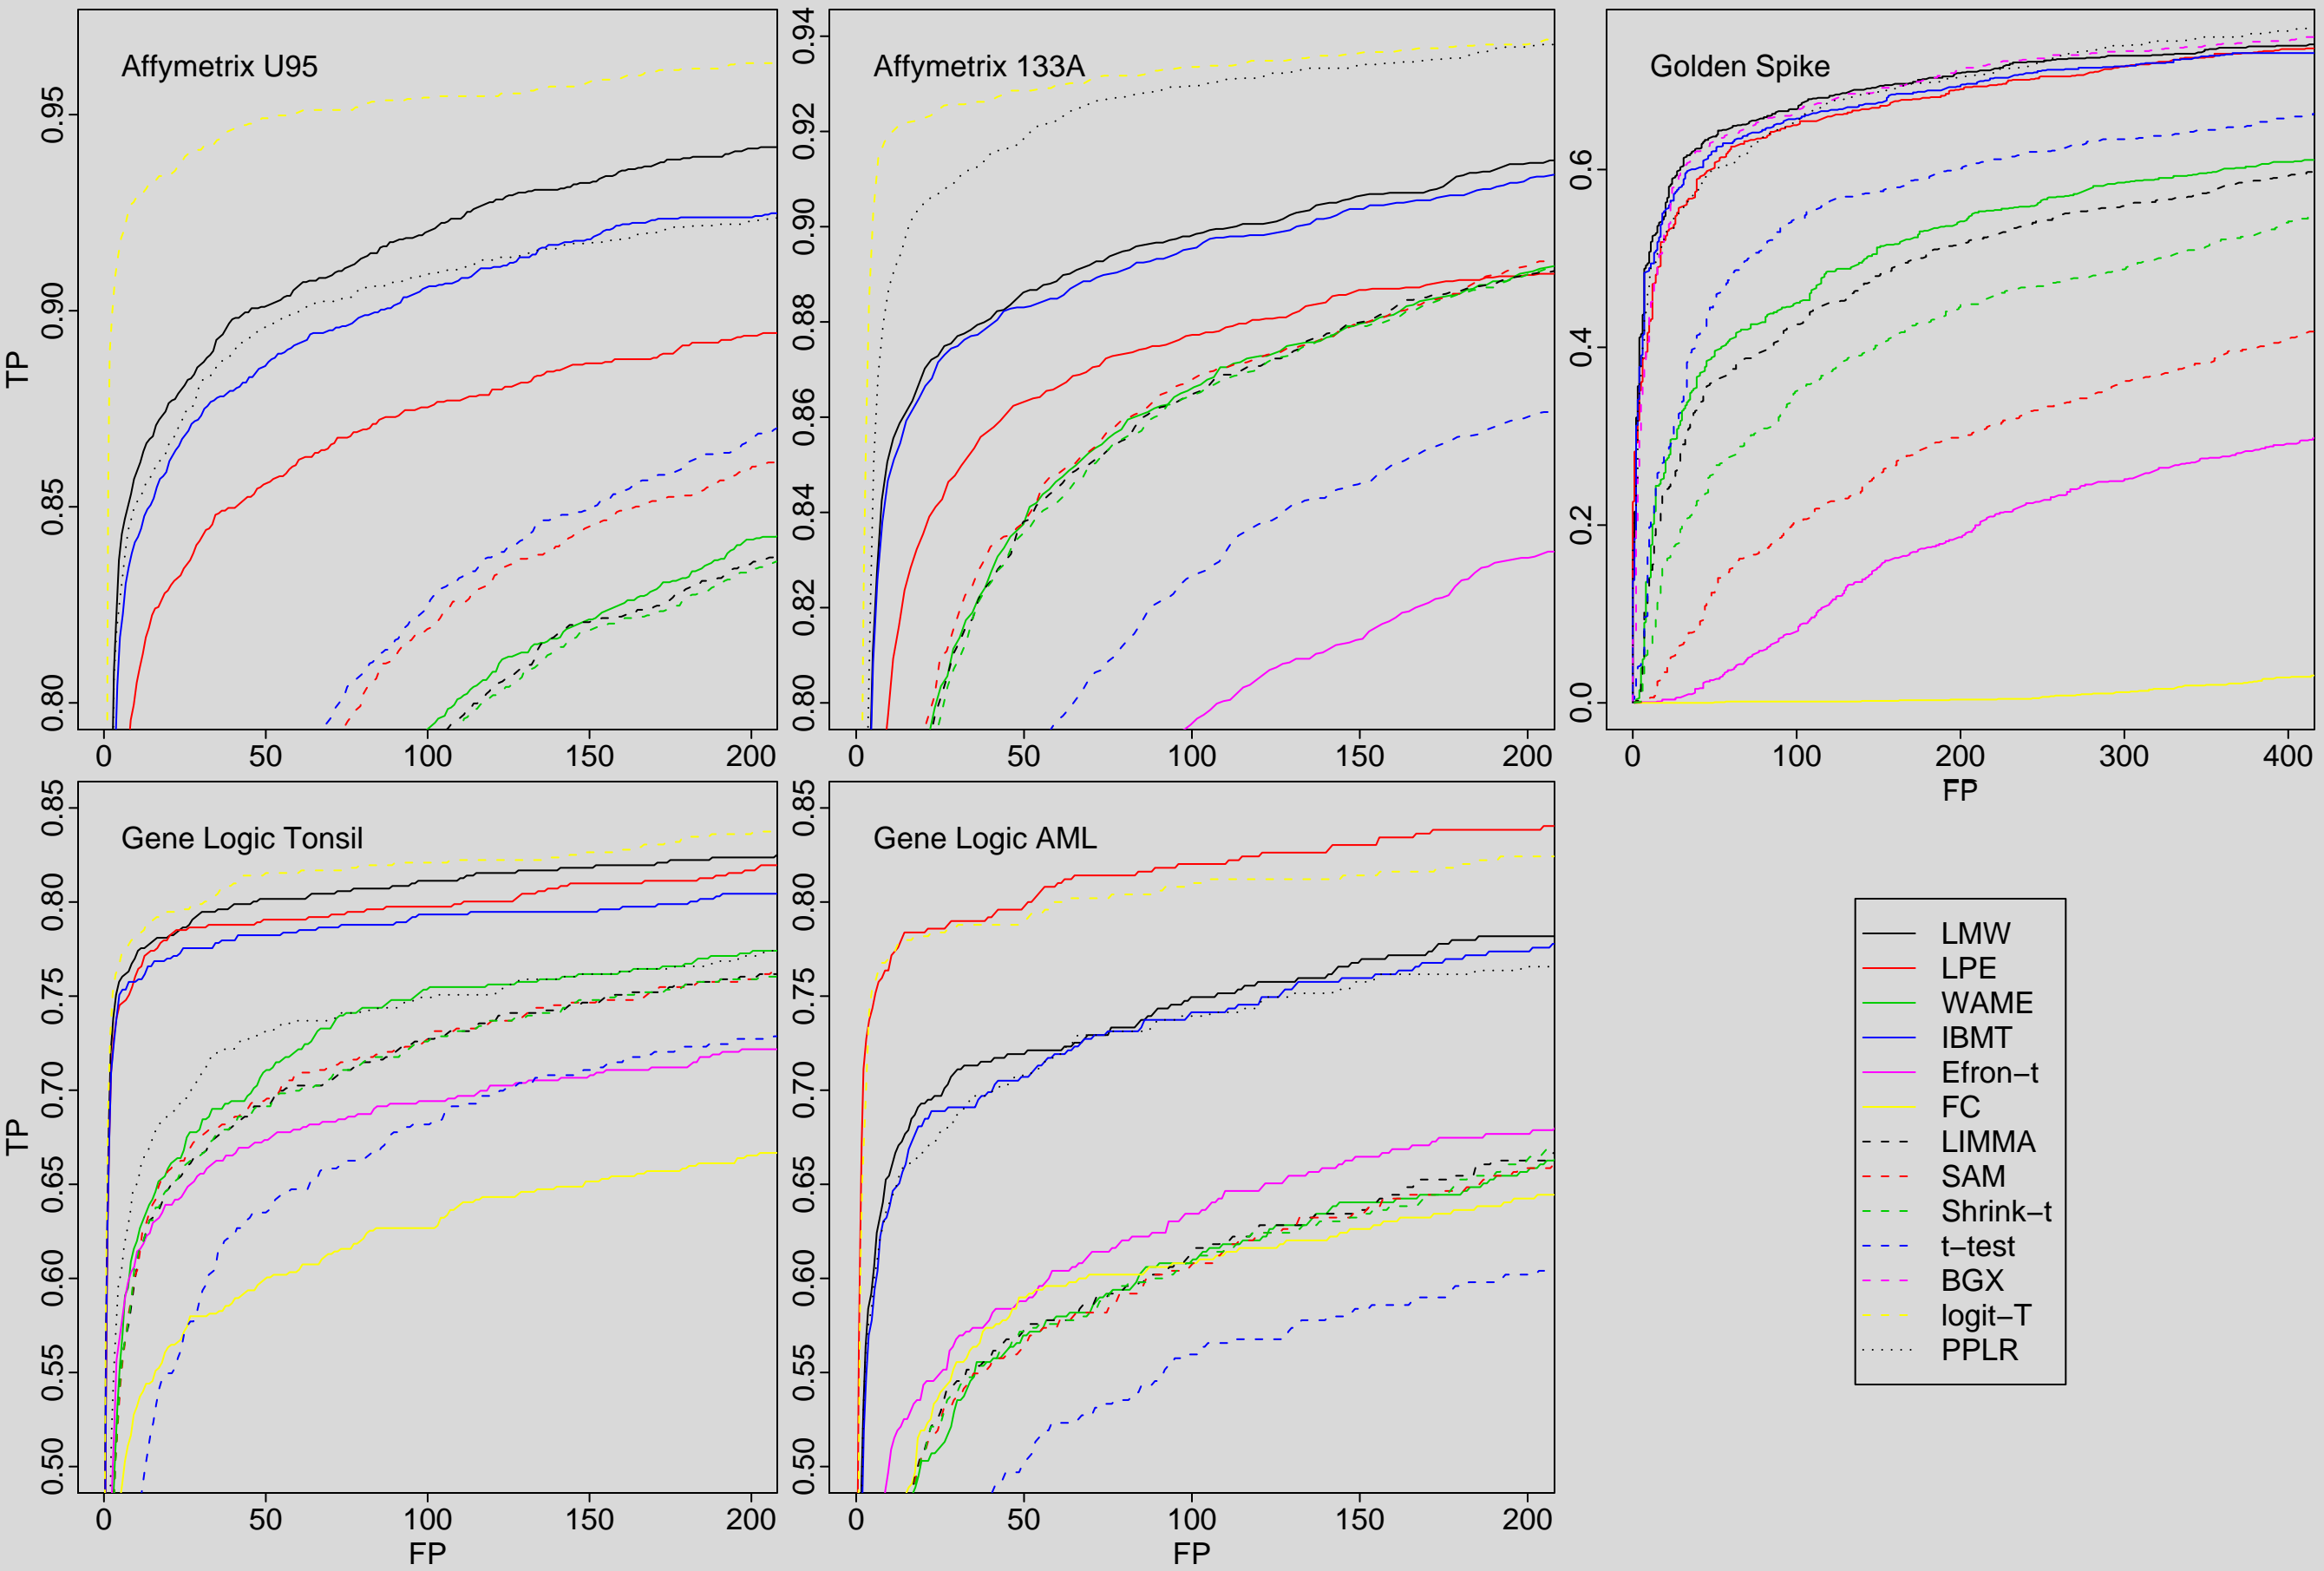

Supplement: 1471-2105-9-156-S3.pdf [file 1471-2105-9-156-S3.pdf]
