# Supplementary material for: Empirical Bayes models for multiple probe type microarrays at the probe level
Source: PubMed Central journal article supplement (PMC2358895; doi:10.1186/1471-2105-9-156), 2008-03-20
Supplement: 1471-2105-9-156-S4.pdf [file 1471-2105-9-156-S4.pdf]

Table 1: Area under ROC curves up to 25, 50, 100 and 200 false positives standardized so that optimum is 1000 and rounded to nearest integer value. Results are based on RMA pre-processed data. Numbers within parenthesis are within data set rank for the compared methods. Methods are ordered with respect to mean rank across data sets for AUC up to 100.

| Affymetrix U95A |         |         |         |         | Affymetrix 133A |         |         |         |         | Golden spike |         |         |         |         |
|-----------------|---------|---------|---------|---------|-----------------|---------|---------|---------|---------|--------------|---------|---------|---------|---------|
| Method          | 25 FP   | 50 FP   | 100 FP  | 200 FP  | Method          | 25 FP   | 50 FP   | 100 FP  | 200 FP  | Method       | 25 FP   | 50 FP   | 100 FP  | 200 FP  |
| PLW             | 940(1)  | 952(1)  | 961(1)  | 968(1)  | PLW             | 905(5)  | 922(5)  | 933(6)  | 942(6)  | PLW          | 349(1)  | 387(1)  | 419(1)  | 446(1)  |
| LMW             | 939(2)  | 951(2)  | 958(2)  | 965(2)  | LMW             | 911(1)  | 928(1)  | 939(1)  | 946(1)  | LMW          | 289(5)  | 323(5)  | 359(5)  | 402(5)  |
| LPE             | 920(5)  | 935(6)  | 945(7)  | 953(7)  | LPE             | 894(11) | 913(11) | 925(11) | 935(11) | LPE          | 326(2)  | 368(2)  | 404(2)  | 437(2)  |
| combined-p      | 916(7)  | 936(5)  | 949(4)  | 963(3)  | combined-p      | 890(12) | 910(12) | 922(12) | 936(10) | combined-p   | 307(4)  | 354(4)  | 392(3)  | 426(4)  |
| WAME            | 924(4)  | 938(4)  | 949(5)  | 959(4)  | WAME            | 908(2)  | 926(2)  | 937(2)  | 932(12) | WAME         | 250(7)  | 292(7)  | 333(7)  | 429(3)  |
| median-t        | 932(3)  | 945(3)  | 955(3)  | 957(5)  | median-t        | 899(8)  | 916(9)  | 927(10) | 945(2)  | median-t     | 310(3)  | 357(3)  | 392(4)  | 379(6)  |
| IBMT            | 913(9)  | 932(9)  | 945(6)  | 955(6)  | IBMT            | 907(3)  | 925(3)  | 936(3)  | 943(4)  | IBMT         | 269(6)  | 305(6)  | 339(6)  | 378(7)  |
| Efron-t         | 918(6)  | 933(7)  | 944(8)  | 953(8)  | Efron-t         | 906(4)  | 924(4)  | 935(4)  | 944(3)  | Efron-t      | 248(8)  | 285(8)  | 324(8)  | 364(9)  |
| FC              | 886(12) | 907(12) | 923(12) | 936(12) | FC              | 902(7)  | 921(7)  | 934(5)  | 943(5)  | FC           | 194(12) | 243(12) | 292(12) | 343(12) |
| LIMMA           | 916(8)  | 932(8)  | 944(9)  | 953(9)  | LIMMA           | 903(6)  | 921(6)  | 933(7)  | 942(7)  | LIMMA        | 244(9)  | 284(9)  | 323(9)  | 364(8)  |
| SAM             | 912(10) | 929(10) | 941(10) | 951(10) | SAM             | 898(9)  | 918(8)  | 930(8)  | 940(8)  | SAM          | 223(11) | 272(11) | 316(11) | 360(10) |
| Shrink-t        | 908(11) | 926(11) | 939(11) | 950(11) | Shrink-t        | 895(10) | 916(10) | 928(9)  | 938(9)  | Shrink-t     | 242(10) | 281(10) | 319(10) | 359(11) |
| t-test          | 746(13) | 805(13) | 852(13) | 891(13) | t-test          | 780(13) | 826(13) | 861(13) | 888(13) | t-test       | 108(13) | 157(13) | 210(13) | 272(13) |

  

| Gene Logic Tonsil |         |         |         |         | Gene Logic AML |         |         |         |         |
|-------------------|---------|---------|---------|---------|----------------|---------|---------|---------|---------|
| Method            | 25 FP   | 50 FP   | 100 FP  | 200 FP  | Method         | 25 FP   | 50 FP   | 100 FP  | 200 FP  |
| PLW               | 841(1)  | 859(1)  | 873(1)  | 882(1)  | PLW            | 819(1)  | 839(1)  | 857(1)  | 871(1)  |
| LMW               | 806(3)  | 823(3)  | 838(3)  | 853(3)  | LMW            | 764(5)  | 788(5)  | 805(5)  | 820(4)  |
| LPE               | 811(2)  | 828(2)  | 843(2)  | 855(2)  | LPE            | 813(2)  | 833(2)  | 849(2)  | 862(2)  |
| combined-p        | 795(4)  | 817(4)  | 832(4)  | 834(6)  | combined-p     | 765(4)  | 790(4)  | 806(4)  | 814(6)  |
| WAME              | 778(6)  | 794(7)  | 807(7)  | 843(5)  | WAME           | 734(8)  | 760(8)  | 783(8)  | 817(5)  |
| median-t          | 789(5)  | 806(5)  | 820(6)  | 824(7)  | median-t       | 761(6)  | 784(6)  | 801(6)  | 804(7)  |
| IBMT              | 748(9)  | 764(9)  | 779(9)  | 793(9)  | IBMT           | 721(9)  | 744(9)  | 762(9)  | 779(9)  |
| Efron-t           | 762(8)  | 776(8)  | 791(8)  | 808(8)  | Efron-t        | 749(7)  | 770(7)  | 786(7)  | 798(8)  |
| FC                | 767(7)  | 800(6)  | 828(5)  | 851(4)  | FC             | 808(3)  | 830(3)  | 846(3)  | 860(3)  |
| LIMMA             | 727(10) | 747(10) | 763(10) | 778(10) | LIMMA          | 712(10) | 734(10) | 754(10) | 772(10) |
| SAM               | 692(12) | 718(12) | 741(12) | 763(12) | SAM            | 677(12) | 711(11) | 737(11) | 759(11) |
| Shrink-t          | 708(11) | 730(11) | 748(11) | 766(11) | Shrink-t       | 684(11) | 706(12) | 727(12) | 746(12) |
| t-test            | 456(13) | 513(13) | 567(13) | 621(13) | t-test         | 403(13) | 465(13) | 524(13) | 580(13) |

Table 2: Area under ROC curves up to 25, 50, 100 and 200 false positives standardized so that optimum is 1000 and rounded to nearest integer value. Results are based on GCRMA pre-processed data. Numbers within parenthesis are within data set rank for the compared methods. Methods are ordered with respect to mean rank across data sets for AUC up to 100.

| Affymetrix U95A |         |         |         |         | Affymetrix 133A |         |         |         |         | Golden spike |         |         |         |         |
|-----------------|---------|---------|---------|---------|-----------------|---------|---------|---------|---------|--------------|---------|---------|---------|---------|
| Method          | 25 FP   | 50 FP   | 100 FP  | 200 FP  | Method          | 25 FP   | 50 FP   | 100 FP  | 200 FP  | Method       | 25 FP   | 50 FP   | 100 FP  | 200 FP  |
| PLW             | 947(1)  | 958(1)  | 965(1)  | 971(1)  | PLW             | 891(8)  | 910(8)  | 922(8)  | 931(8)  | PLW          | 443(1)  | 497(1)  | 537(1)  | 575(1)  |
| LMW             | 929(3)  | 942(3)  | 952(3)  | 961(4)  | LMW             | 901(1)  | 920(1)  | 931(1)  | 939(1)  | LMW          | 395(3)  | 451(4)  | 497(5)  | 538(5)  |
| median-t        | 941(2)  | 954(2)  | 963(2)  | 970(2)  | median-t        | 882(10) | 903(10) | 917(10) | 927(10) | median-t     | 383(4)  | 453(3)  | 502(2)  | 541(4)  |
| IBMT            | 920(5)  | 936(5)  | 950(5)  | 960(5)  | IBMT            | 897(2)  | 893(12) | 908(12) | 919(12) | IBMT         | 365(6)  | 449(5)  | 498(4)  | 542(2)  |
| combined-p      | 916(6)  | 934(6)  | 946(6)  | 956(6)  | combined-p      | 868(12) | 895(11) | 910(11) | 921(11) | combined-p   | 381(5)  | 458(2)  | 500(3)  | 542(3)  |
| LPE             | 920(4)  | 938(4)  | 952(4)  | 962(3)  | LPE             | 875(11) | 917(2)  | 929(2)  | 937(3)  | LPE          | 410(2)  | 421(6)  | 468(6)  | 514(6)  |
| Efron-t         | 914(8)  | 929(7)  | 942(7)  | 953(7)  | Efron-t         | 894(4)  | 915(4)  | 928(4)  | 937(4)  | Efron-t      | 250(8)  | 316(8)  | 373(8)  | 433(10) |
| WAME            | 915(7)  | 929(8)  | 941(10) | 952(10) | WAME            | 896(3)  | 917(3)  | 929(3)  | 938(2)  | WAME         | 260(7)  | 328(7)  | 388(7)  | 450(7)  |
| FC              | 895(12) | 913(12) | 928(12) | 940(12) | FC              | 891(7)  | 912(7)  | 926(7)  | 935(7)  | FC           | 205(12) | 250(12) | 297(13) | 355(13) |
| LIMMA           | 913(9)  | 929(9)  | 941(9)  | 952(9)  | LIMMA           | 892(5)  | 914(5)  | 927(5)  | 936(5)  | LIMMA        | 246(9)  | 314(9)  | 372(9)  | 434(8)  |
| SAM             | 911(10) | 928(10) | 941(8)  | 953(8)  | SAM             | 892(6)  | 913(6)  | 927(6)  | 936(6)  | SAM          | 219(11) | 291(11) | 363(11) | 432(11) |
| Shrink-t        | 907(11) | 925(11) | 940(11) | 952(11) | Shrink-t        | 883(9)  | 905(9)  | 920(9)  | 931(9)  | Shrink-t     | 227(10) | 298(10) | 367(10) | 434(9)  |
| t-test          | 768(13) | 821(13) | 864(13) | 900(13) | t-test          | 748(13) | 803(13) | 843(13) | 872(13) | t-test       | 151(13) | 212(13) | 298(12) | 383(12) |

  

| Gene Logic Tonsil |         |         |         |         | Gene Logic AML |         |         |         |         |
|-------------------|---------|---------|---------|---------|----------------|---------|---------|---------|---------|
| Method            | 25 FP   | 50 FP   | 100 FP  | 200 FP  | Method         | 25 FP   | 50 FP   | 100 FP  | 200 FP  |
| PLW               | 836(1)  | 853(1)  | 866(1)  | 877(1)  | PLW            | 837(1)  | 857(1)  | 873(1)  | 887(1)  |
| LMW               | 809(3)  | 823(3)  | 836(3)  | 849(3)  | LMW            | 738(7)  | 769(7)  | 793(6)  | 810(6)  |
| median-t          | 807(4)  | 821(4)  | 832(4)  | 843(4)  | median-t       | 774(4)  | 796(5)  | 812(5)  | 830(4)  |
| IBMT              | 774(9)  | 842(2)  | 857(2)  | 870(2)  | IBMT           | 705(8)  | 797(4)  | 813(4)  | 825(5)  |
| combined-p        | 822(2)  | 809(6)  | 825(6)  | 838(6)  | combined-p     | 770(5)  | 848(2)  | 861(2)  | 870(3)  |
| LPE               | 789(6)  | 791(9)  | 806(9)  | 820(9)  | LPE            | 830(2)  | 736(8)  | 757(8)  | 775(10) |
| Efron-t           | 780(7)  | 798(7)  | 815(7)  | 828(7)  | Efron-t        | 749(6)  | 773(6)  | 790(7)  | 805(7)  |
| WAME              | 798(5)  | 814(5)  | 827(5)  | 841(5)  | WAME           | 690(10) | 727(10) | 754(10) | 777(9)  |
| FC                | 776(8)  | 792(8)  | 810(8)  | 826(8)  | FC             | 826(3)  | 846(3)  | 860(3)  | 874(2)  |
| LIMMA             | 761(10) | 780(10) | 798(10) | 814(10) | LIMMA          | 675(11) | 708(11) | 733(11) | 753(11) |
| SAM               | 748(11) | 770(11) | 787(11) | 807(11) | SAM            | 698(9)  | 731(9)  | 757(9)  | 777(8)  |
| Shrink-t          | 745(12) | 762(12) | 781(12) | 799(12) | Shrink-t       | 642(12) | 675(12) | 705(12) | 728(12) |
| t-test            | 528(13) | 589(13) | 644(13) | 693(13) | t-test         | 431(13) | 485(13) | 530(13) | 578(13) |

Table 3: Area under ROC curves up to 25, 50, 100 and 200 false positives standardized so that optimum is 1000 and rounded to nearest integer value. Results are based on MAS5 expression indexes, (upper parts of sub-tables) together with results for BGX, logit-t, and PPLR (lower part of sub-tables). The last three all have their own pre-processing of PM and MM probe intensities, PPLR was applied to multi-mgMOS probe set summaries. Numbers within parenthesis are within data set rank for the compared methods, and methods are ordered with respect to mean rank across data sets for AUC up to 100 (Within MAS5 based results only). The results for BGX from the Gene Logic AML data set in *italic* is based on a subset of 1011 probe sets only.

| Affymetrix U95A |         |         |         |         | Affymetrix 133A |         |         |         |         | Golden spike |        |        |        |        |
|-----------------|---------|---------|---------|---------|-----------------|---------|---------|---------|---------|--------------|--------|--------|--------|--------|
| Method          | 25 FP   | 50 FP   | 100 FP  | 200 FP  | Method          | 25 FP   | 50 FP   | 100 FP  | 200 FP  | Method       | 25 FP  | 50 FP  | 100 FP | 200 FP |
| LMW             | 830(1)  | 862(1)  | 887(1)  | 910(1)  | LMW             | 823(1)  | 851(1)  | 872(1)  | 889(1)  | LMW          | 478(1) | 549(1) | 602(1) | 647(1) |
| IBMT            | 810(2)  | 844(2)  | 870(2)  | 894(2)  | IBMT            | 818(2)  | 848(2)  | 869(2)  | 886(2)  | IBMT         | 463(2) | 531(2) | 586(2) | 632(2) |
| LPE             | 762(3)  | 805(3)  | 836(3)  | 861(3)  | LPE             | 774(3)  | 814(3)  | 843(3)  | 864(3)  | LPE          | 434(3) | 505(3) | 569(3) | 620(3) |
| WAME            | 587(5)  | 653(6)  | 712(6)  | 766(6)  | WAME            | 699(5)  | 761(5)  | 808(5)  | 844(5)  | WAME         | 165(5) | 258(5) | 342(5) | 423(5) |
| SAM             | 610(4)  | 678(4)  | 737(4)  | 790(5)  | SAM             | 708(4)  | 767(4)  | 812(4)  | 846(4)  | SAM          | 17(8)  | 51(8)  | 110(8) | 182(8) |
| LIMMA           | 584(7)  | 651(7)  | 708(7)  | 763(7)  | LIMMA           | 694(6)  | 758(6)  | 805(6)  | 842(6)  | LIMMA        | 143(6) | 230(6) | 311(6) | 394(6) |
| Shrink-t        | 583(8)  | 649(8)  | 706(8)  | 760(8)  | Shrink-t        | 685(7)  | 753(7)  | 802(7)  | 840(7)  | Shrink-t     | 83(7)  | 150(7) | 226(7) | 314(7) |
| t-test          | 585(6)  | 665(5)  | 733(5)  | 791(4)  | t-test          | 638(8)  | 702(8)  | 755(8)  | 801(8)  | t-test       | 178(4) | 284(4) | 394(4) | 485(4) |
| Efron-t         | 540(9)  | 599(9)  | 648(9)  | 690(9)  | Efron-t         | 585(9)  | 666(9)  | 724(9)  | 769(9)  | Efron-t      | 2(9)   | 8(9)   | 31(9)  | 88(9)  |
| FC              | 454(10) | 509(10) | 556(10) | 599(10) | FC              | 460(10) | 545(10) | 608(10) | 660(10) | FC           | 0(10)  | 0(10)  | 1(10)  | 1(10)  |
| BGX             | -       | -       | -       | -       | BGX             | -       | -       | -       | -       | BGX          | 414    | 513    | 582    | 636    |
| logit-T         | 912     | 928     | 940     | 949     | logit-T         | 890     | 908     | 920     | 928     | logit-T      | -      | -      | -      | -      |
| PPLR            | 826     | 857     | 880     | 899     | PPLR            | 853     | 883     | 905     | 919     | PPLR         | 486    | 572    | 635    | 688    |

  

| Gene Logic Tonsil |         |         |         |         | Gene Logic AML |            |            |            |            |
|-------------------|---------|---------|---------|---------|----------------|------------|------------|------------|------------|
| Method            | 25 FP   | 50 FP   | 100 FP  | 200 FP  | Method         | 25 FP      | 50 FP      | 100 FP     | 200 FP     |
| LMW               | 758(1)  | 777(1)  | 791(1)  | 805(1)  | LMW            | 636(2)     | 675(2)     | 703(2)     | 735(2)     |
| IBMT              | 745(3)  | 762(3)  | 775(3)  | 786(3)  | IBMT           | 622(3)     | 660(3)     | 694(3)     | 726(3)     |
| LPE               | 749(2)  | 768(2)  | 781(2)  | 794(2)  | LPE            | 753(1)     | 773(1)     | 793(1)     | 812(1)     |
| WAME              | 591(4)  | 641(4)  | 688(4)  | 725(4)  | WAME           | 432(8)     | 490(8)     | 540(8)     | 588(7)     |
| SAM               | 583(6)  | 633(5)  | 673(5)  | 710(5)  | SAM            | 426(9)     | 487(9)     | 537(9)     | 586(9)     |
| LIMMA             | 579(8)  | 628(7)  | 670(6)  | 708(6)  | LIMMA          | 436(6)     | 496(6)     | 543(6)     | 591(5)     |
| Shrink-t          | 580(7)  | 629(6)  | 670(7)  | 708(7)  | Shrink-t       | 432(7)     | 492(7)     | 540(7)     | 588(8)     |
| t-test            | 453(10) | 533(10) | 597(9)  | 654(9)  | t-test         | 326(10)    | 399(10)    | 466(10)    | 524(10)    |
| Efron-t           | 586(5)  | 624(8)  | 655(8)  | 681(8)  | Efron-t        | 481(4)     | 528(4)     | 571(4)     | 616(4)     |
| FC                | 509(9)  | 548(9)  | 582(10) | 616(10) | FC             | 449(5)     | 508(5)     | 554(5)     | 590(6)     |
| BGX               | -       | -       | -       | -       | BGX            | <i>604</i> | <i>695</i> | <i>750</i> | <i>790</i> |
| logit-T           | 770     | 788     | 803     | 815     | logit-T        | 748        | 768        | 785        | 800        |
| PPLR              | 628     | 673     | 707     | 734     | PPLR           | 620        | 658        | 693        | 724        |
